# Supplementary material
Source: PubMed Central journal article supplement (PMC8164821)
Supplement: gaab031_supplementary_data.pdf [file gaab031_supplementary_data.pdf]

## **Supplementary Information:**

### **Oocyte-Secreted Factors Strongly Stimulate sFRP4 Expression in Human Cumulus Cells**

Contents Page

Page 2: Supplementary Figure 1: Full SFRP4 and  $\beta$ -actin protein blots

## Supplemental Figure 1 (Blots for figure 2)

### SFRP4 Blot in full for patients 128, 309, and 312

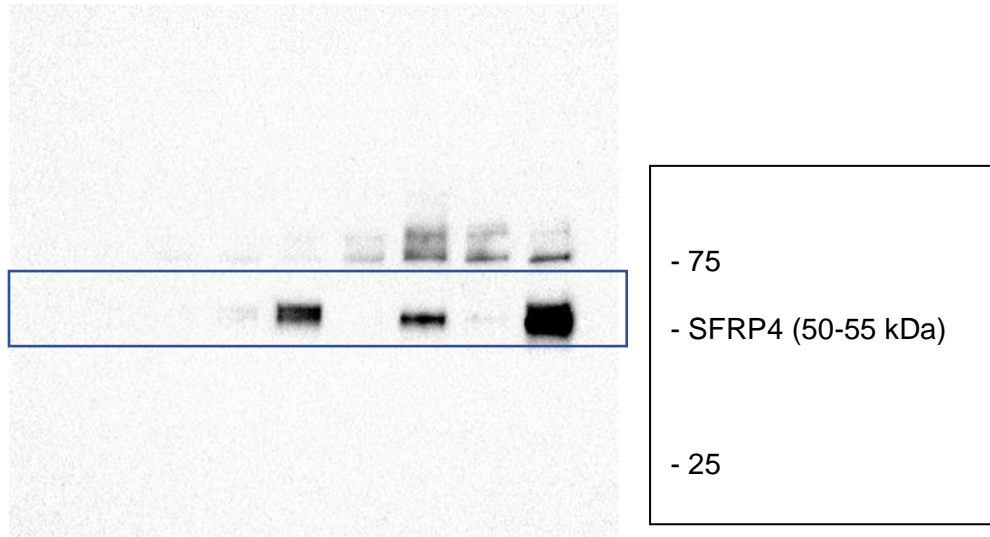

### $\beta$ -Actin Blot in full for patients 128, 309, and 312

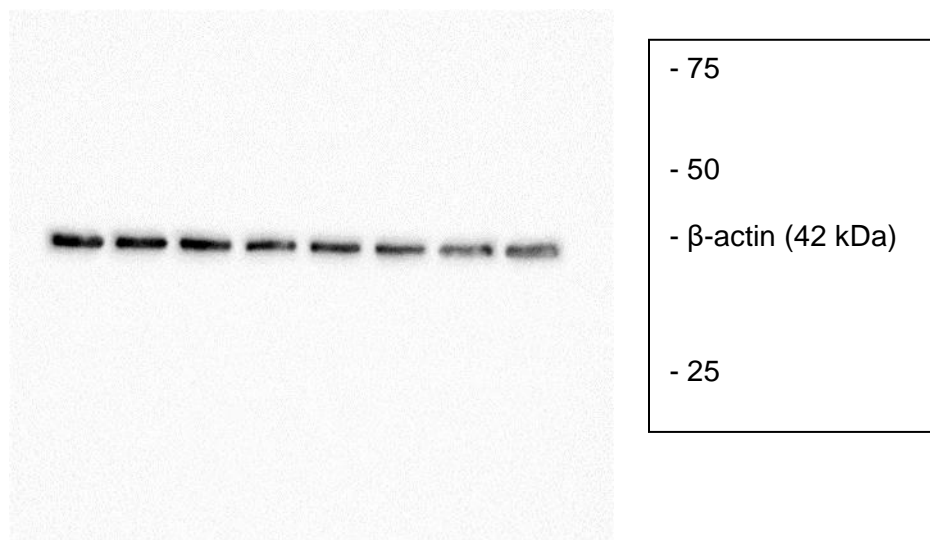

**The combination of GDF9 and BMP15 stimulates SFRP4 protein synthesis.** SFRP4 protein and  $\beta$ -actin levels were quantified by Western Blot. For the SFRP4, the top bands are unspecific and do not correspond to the molecular weight of SFRP4 (50-55 kDa)

## Full SFRP4 and $\beta$ -actin Blot for patient 132.

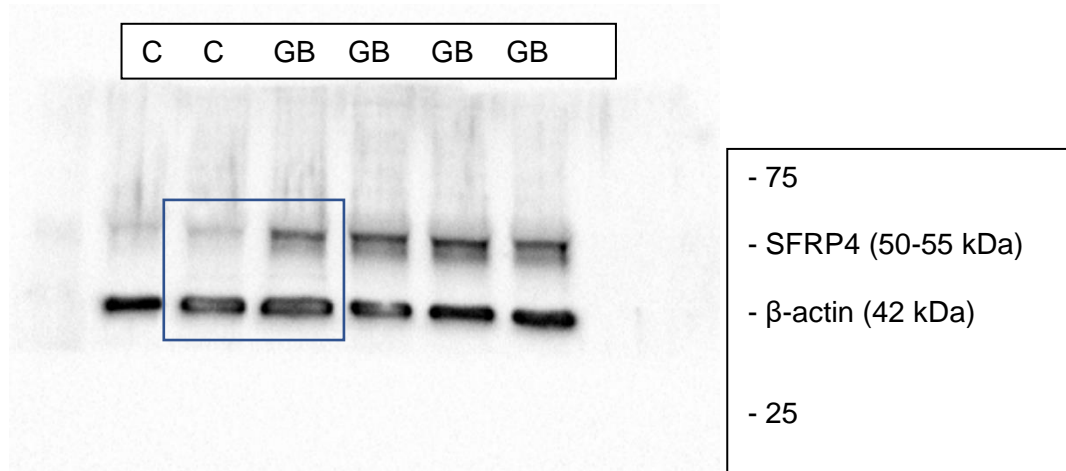

**The combination of GDF9 and BMP15 stimulates SFRP4 protein synthesis.** SFRP4 protein and  $\beta$ -actin levels were quantified by Western Blot in patient #132 in duplicate for the control group and in triplicate for the GB group. The same Blot was incubated first with an anti-SFRP4 antibody (top band) and then with an anti- $\beta$ -actin antibody (bottom band).
